# Supplementary material for: Testing, tracing and isolation in compartmental models
Source: PubMed Central journal article supplement (PMC7932151; doi:10.1371/journal.pcbi.1008633), 2021-03-04
Supplement: pcbi.1008633.s001.pdf [file pcbi.1008633.s001.pdf]

**Reproducibility report for:** Testing, tracing and isolation in compartmental models

**Submitted to:** PLoS Computational Biology

**Manuscript number/identifier:** PCOMPBIOL-D-20-00860

**Curation outcome summary:** Following the documentation available in the Github repository provided by the authors we were unable to reproduce the simulation results presented in this submission. The model source code could, however, be utilized by the curator in developing new scripts to produce some of the data presented in this submission.

**Box 1:** Criteria for repeatability and reproducibility

**Model source code provided:**

Source code: a standard procedural language is used (e.g. MATLAB, Python, C)

There are details/documentation on how the source code was compiled

There are details on how to run the code in the provided documentation

The initial conditions are provided for each of the simulations

Details for creating reported graphical results from the simulation results

Source code: a declarative language is used (e.g. SBML, CellML, NeuroML)

The algorithms used are defined or cited in previous articles

The algorithm parameters are defined

Post-processing of the results are described in sufficient detail

**Model source code not provided:**

The model is executable without source (e.g. desktop application, compiled code, online service)

There are sufficient details to repeat the required simulation experiments

**The model is described mathematically in the article(s):**

Equations representing the biological system

There are tables or lists of parameter values

There are tables or lists of initial conditions

Machine-readable tables of parameter values

Machine-readable tables of initial conditions

**The simulation experiments using the model are described mathematically in the article:**

Integration algorithms used are defined

Stochastic algorithms used are defined

Random number generator algorithms used are defined

Parameter fitting algorithms are defined

The paper indicates how the algorithms yield the desired output

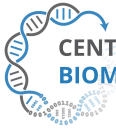

**Box 2: Criteria for accessibility**

- Model/ source code is available at a public repository or researcher's web site
  - Prohibitive license provided
  - Permissive license provided
  - Open-source license provided
- All initial conditions and parameters are provided
- All simulation experiments are fully defined (events listed, collection times and measurements specified, algorithms provided, simulator specified, etc.)

**Box 3: Rules for Credible practice of Modeling and Simulation<sup>a</sup>**

<sup>a</sup>Model credibility is assessed using the Interagency Modeling and Analysis Group conformance rubric:  
<https://www.imagwiki.nibib.nih.gov/content/10-simple-rules-conformance-rubric>

- Define context clearly: Extensive
- Use appropriate data: Adequate
- Evaluate within context: Extensive
- List limitations explicitly: Adequate
- Use version control: Adequate
- Document adequately: Adequate
- Conform to standards: Insufficient

**Box 4: Evaluation**

- Model and its simulations could be repeated using provided declarative or procedural code
- Model and its simulations could be reproduced

**Summary comments:** Implementation of the model reported in this submission was provided as Python code available for download from a Github repository. This was used in our attempt to reproduce the simulation results reported in this manuscript. Running the sample “ptti” commands we were able to produce the example plots reported in the source code documentation. We were unable to successfully run the suggested benchmark commands to reproduce the results from this manuscript as reported in the Github documentation. We were, however, able to use the programmatic interface of the model codes as well as the “ptti” module to reproduce some of the results presented in Figures 2, 4, 6 and 7 from Python scripts written by the curator. Specifically, we were able to produce curves associated with both the ODE-based and ABM simulations using information found in the .yaml files of the benchmarks folder. This leads us to believe that with some clarity in the use of the provided code and its distribution, this submission would be reproducible.



Anand K. Rampadarath<sup>1</sup>, PhD  
Curator  
Center for Reproducible Biomedical Modeling



David P. Nickerson, PhD  
Curation Service Director  
Center for Reproducible Biomedical Modeling

Auckland Bioengineering Institute,  
University of Auckland

---

<sup>1</sup>Email: [a.rampadarath@auckland.ac.nz](mailto:a.rampadarath@auckland.ac.nz)
